# Supplementary material for: Preparation of Coaxial-Electrospun Poly[bis(p-methylphenoxy)]phosphazene Nanofiber Membrane for Enzyme Immobilization
Source: PubMed Central journal article supplement (PMC3509571; doi:10.3390/ijms131114136), 2012-11-02

## Supplementary Information

**Table S1.** Electrospinning parameters for PAN and PMPPh/PAN nanofiber membranes used for lipase immobilization.

| Material  | Voltage (kV) | Collecting distance (cm) | Flow rate (mL/h)       | Temperature (°C) | Humidity |
|-----------|--------------|--------------------------|------------------------|------------------|----------|
| PAN       | 16           | 15                       | 0.4                    | 25               | 60%      |
| PMPPh/PAN | 16           | 15                       | 0.2 for both solutions | 25               | 60%      |

**Figure S1.** FT-IR spectrum of PMPPh.

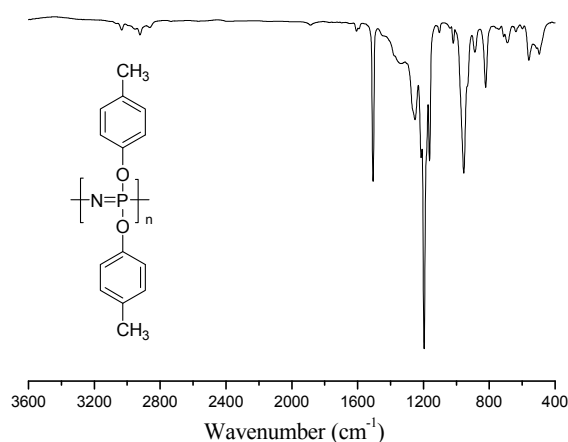

**Figure S2.** <sup>1</sup>H NMR spectrum of PMPPh.

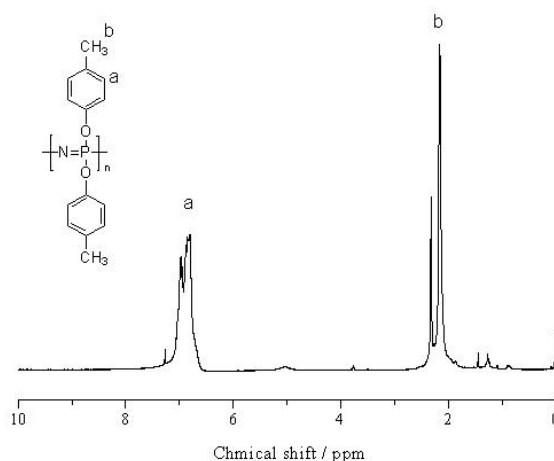

Supplement: ijms-13-14136-s001.pdf [file ijms-13-14136-s001.pdf]
